# Supplementary material for: Examining the dimensionality of morphological knowledge and morphological awareness and their effects on second language vocabulary knowledge
Source: Frontiers journal article supplement (doi:10.3389/fpsyg.2023.1207854), 2023-08-11
Supplement: Data_Sheet_1.PDF [file Data_Sheet_1.PDF]

## 词汇量测试

### First 1000

1. see: They **saw** it.
  - a. 切
  - b. 等待
  - c. 看
  - d. 开始
2. time: They have a lot of **time**.
  - a. 钱
  - b. 食物
  - c. 时间
  - d. 朋友
3. period: It was a difficult **period**.
  - a. 问题
  - b. 时间
  - c. 要做的事情
  - d. 书
4. figure: Is this the right **figure**?
  - a. 答案
  - b. 地方
  - c. 时间
  - d. 号码
5. poor: We **are poor**.
  - a. 贫穷的
  - b. 感到幸福的
  - c. 很感兴趣的
  - d. 不喜欢努力工作的
6. drive: He **drives** fast.
  - a. 游泳
  - b. 学习
  - c. 扔球
  - d. 开车
7. jump: She tried to **jump**.
  - a. 漂浮
  - b. 跳
  - c. 停车
  - d. 跑
8. shoe: Where is your **shoe**?
  - a. 父或母
  - b. 钱包
  - c. 钢笔
  - d. 鞋子
9. standard: Her **standards** are very high.
  - a. 后跟
  - b. 分数
  - c. 要价
  - d. 标准
10. basis: I don't understand the **basis**.
  - a. 原因
  - b. 话
  - c. 路标
  - d. 中心议题

### Second 1000

1. maintain: Can they **maintain** it?
  - a. 维持
  - b. 扩大
  - c. 改善
  - d. 得到
2. stone: He sat on a **stone**.
  - a. 石头
  - b. 凳子
  - c. 垫子
  - d. 树枝
3. upset: I am **upset**.
  - a. 疲倦的
  - b. 著名的
  - c. 富足的
  - d. 不高兴的
4. drawer: The **drawer** was empty.
  - a. 抽屉
  - b. 车库
  - c. 冰箱
  - d. 鸟笼

5. patience: He **has no** patience.

- a. 没有耐心
- b. 很忙
- c. 没有信心
- d. 不公正

6. nil: His mark for that question was **nil**.

- a. 很差的
- b. 什么也没有的
- c. 很好的
- d. 中等的

7. pub: They went to the **pub**.

- a. 酒吧
- b. 银行
- c. 商场
- d. 游泳池

8. circle: Make a **circle**.

- a. 素描
- b. 空白
- c. 圆圈
- d. 大洞

9. microphone: Please use the **microphone**.

- a. 微波炉
- b. 麦克风
- c. 显微镜
- d. 手机

10. pro: He's a **pro**.

- a. 间谍
- b. 傻瓜
- c. 记者
- d. 职业运动员

c. 降价

d. 复原

3. jug: He was holding a **jug**.

- a. 罐子
- b. 聊天
- c. 贝雷帽
- d. 枪

4. scrub: He is **scrubbing** it.

- a. 抓
- b. 修理
- c. 刷洗
- d. 作素描

5. dinosaur: The children were pretending to be **dinosaurs**.

- a. 海盗
- b. 仙女
- c. 龙
- d. 恐龙

6. strap: He broke the **strap**.

- a. 诺言
- b. 盖子
- c. 盘子
- d. 带子

7. pave: It was **paved**.

- a. 堵塞
- b. 分开
- c. 镶金边
- d. 铺路

8. dash: They **dashed** over it.

- a. 猛冲
- b. 磨蹭
- c. 争吵
- d. 瞥见

9. rove: He couldn't stop **roving**.

- a. 喝醉
- b. 漂泊
- c. 哼曲子
- d. 努力工作

### Third 1000

1. soldier: He is a **soldier**.

- a. 商人
- b. 学生
- c. 金属工艺制造者
- d. 士兵

2. restore: It has been **restored**.

- a. 重复
- b. 重新分配

10. lonesome: He felt **lonesome**.  
a. 不领情的  
b. 疲倦的  
c. 孤独的  
d. 精力充沛的

#### Fourth 1000

1. compound: They made a new **compound**.  
a. 协议  
b. 复合物  
c. 公司  
d. 预言
2. latter: I agree with the **latter**.  
a. 牧师  
b. 理由  
c. 后者  
d. 答案
3. candid: Please be **candid**.  
a. 小心的  
b. 表示同情的  
c. 公平的  
d. 直率的
4. tummy: Look at my **tummy**.  
a. 围巾  
b. 肚子  
c. 松鼠  
d. 拇指
5. quiz: We made a **quiz**.  
a. 箭筒  
b. 错误  
c. 竞赛  
d. 鸟巢
6. input: We need more **input**.  
a. 输入  
b. 工人  
c. 填料  
d. 钱

7. crab: Do you like **crabs**?  
a. 蟹  
b. 薄脆饼干  
c. 又紧又硬的领子  
d. 蟋蟀

8. vocabulary: You will need more **vocabulary**.  
a. 词汇  
b. 技巧  
c. 钱  
d. 枪

9. remedy: We found a good **remedy**.  
a. 矫正问题的方法  
b. 餐馆  
c. 食谱  
d. 等式

10. allege: They **alleged it**.  
a. 辩解  
b. 剽窃  
c. 证明  
d. 反抗

#### Fifth 1000

1. deficit: The company **had a large deficit**.  
a. 出现赤字  
b. 贬值  
c. 有这笔大开销的计划  
d. 在银行里有很多存款
2. weep: He **wept**.  
a. 毕业  
b. 哭  
c. 死  
d. 担心
3. nun: We saw a **nun**.  
a. 蠕虫  
b. 事故  
c. 修女  
d. 天空中无法解释的亮光

4. haunt: The house is **haunted**.
  - a. 充满了装饰物
  - b. 已被出租
  - c. 空的
  - d. 闹鬼
5. compost: We need some **compost**.
  - a. 大力支持
  - b. 扶持
  - c. 混凝土
  - d. 堆肥
6. cube: I need one more **cube**.
  - a. 大头针
  - b. 立方体
  - c. 缸子
  - d. 卡片
7. miniature: It is a **miniature**.
  - a. 微型画
  - b. 显微镜
  - c. 微生物
  - d. 在书法中把字母连在一起细小的连线
8. peel: Shall I **peel** it?
  - a. 浸泡
  - b. 削皮
  - c. 烫洗
  - d. 切成薄片
9. fracture: They found a **fracture**.
  - a. 裂口
  - b. 碎片
  - c. 夹克衫
  - d. 稀有的宝石
10. bacterium: They didn't find a single **bacterium**.
  - a. 细菌
  - b. 开有红色或橘黄色花的植物
  - c. 骆驼
  - d. 赃物
- a. 诡计多端的
- b. 成熟的
- c. 考虑不周详的
- d. 过于昂贵的
2. premier: The **premier** spoke for an hour.
  - a. 律师
  - b. 讲师
  - c. 冒险家
  - d. 总理
3. butler: They have a **butler**.
  - a. 男管家
  - b. 锯
  - c. 家庭教师
  - d. 地窖
4. accessory: They gave us some **accessories**.
  - a. 签证
  - b. 官方命令
  - c. 选择
  - d. 额外的零件
5. threshold: They raised the **threshold**.
  - a. 旗子
  - b. 门槛
  - c. 天花板
  - d. 利息
6. thesis: She has completed her **thesis**.
  - a. 论文
  - b. 归纳证词
  - c. 试用期
  - d. 延期治疗
7. strangle: He **strangled** her.
  - a. 掐死
  - b. 宠坏
  - c. 绑架
  - d. 赞美
8. cavalier: He treated her in a **cavalier** manner.
  - a. 慢待的
  - b. 礼貌的

#### Sixth 1000

1. devious: Your plans are **devious**.

- c. 尴尬的
  - d. 兄长的
9. malign: His **malign** influence is still felt.
- a. 邪恶的
  - b. 好的
  - c. 非常重要的
  - d. 秘密的
10. veer: The car **veered**.
- a. 改变方向或路线
  - b. 剧烈晃动
  - c. 发生逆火引起爆鸣
  - d. 打滑

#### Seventh 1000

1. olive: We bought **olives**.
- a. 橄榄
  - b. 康乃馨
  - c. 男人的游泳衣
  - d. 清除杂草的工具
2. quilt: They made a **quilt**.
- a. 遗嘱
  - b. 合同
  - c. 被子
  - d. 羽毛笔
3. stealth: They did it by **stealth**.
- a. 花费大量的钱
  - b. 逼迫
  - c. 悄悄的或秘密的行动
  - d. 没有注意到所遇到的问题
4. shudder: The boy **shuddered**.
- a. 低语
  - b. 差点摔倒
  - c. 发抖
  - d. 大声叫喊
5. bristle: The **bristles** are too hard.
- a. 问题
  - b. 短而硬的毛发
  - c. 折叠床
  - d. 鞋底

6. bloc: They have joined this **bloc**.
- a. 乐队
  - b. 小偷帮
  - c. 侦察员
  - d. 集团
7. demography: This book is about **demography**.
- a. 土地使用模式研究
  - b. 用图片表示数字事实的研究
  - c. 水文学
  - d. 人口学
8. gimmick: That's a good **gimmick**.
- a. 高空作业时所站的东西
  - b. 钱包
  - c. 引人注意的行为或事物
  - d. 花招
9. azalea: This **azalea** is very pretty.
- a. 杜鹃花
  - b. 由天然棉所制成的很轻的材料
  - c. 莎丽
  - d. 扇贝
10. yoghurt: This **yoghurt** is disgusting.
- a. 淤泥
  - b. 伤口
  - c. 酸奶
  - d. 榲桲

#### Eighth 1000

1. erratic: He was **erratic**.
- a. 完美的
  - b. 很坏的
  - c. 很有礼貌的
  - d. 不可靠的
2. palette: He lost his **palette**.
- a. 装鱼的篮子
  - b. 胃口
  - c. 年轻的女伴
  - d. 调色板

## ENGLISH WORD ASSOCIATES TEST

每个单词下面都有 8 个词汇，请你选出和所给词汇有关的 4 个词。

比如 delicious 这个单词，与之相关的有 good-tasting (adj.)好吃的一这是同义词，还有 food(n.)—这个是可以配搭的名词，好吃的食物

注意：请根据题号，在答题卡上画答案！一共 20 个单词，每个单词下面有两个框，一个框在答题卡上代表一题，所以在答题卡上要涂  $20 \times 2 = 40$  题。还要记住：每个单词下面一共选 4 个对应的词！比如：beautiful 下面的第 1 题和第 2 题加起来要选出 4 个答案！

**Beautiful**

1.  
A.  
enjoyable B.expensive C.free D.loud

2.  
A.  
education B.face C.music D.weather

**Bright**

3.  
A.clever B.famous C.happy D.shining

4.  
A.color B.hand C.poem D.taste

**Calm**

5.  
A.open B.quiet C.smooth D.tired

6.  
A.cloth B.day C.light D.person

**Natural**

7.  
A.expected B.helpful C.real D.short

8.  
A.foods B.neighbors C.parents D.songs

**Fresh**

9.  
A.another B.cool C.easy D.raw

10.  
A.cotton B.heat C.language D.water

**General**

11.  
A.closed B.different C.usual D.whole

12.  
A.country B.idea C.reader D.street

名字\_\_\_\_\_

**Bare**

**13.**

A.empty B.heavy C.uncovered D.useful

**14.**

A.cupboard B.feet C.school D.tool

**Acute**

**15.**

A.hidden B.often C.rich D.sharp

**16.**

A.angle B.hearing C.illness D.stones

**Common**

**17.**

A.complete B.light C.ordinary D.shared

**18.**

A.boundary B.circle C.name D.party

**Complex**

**19.**

A.angry B.difficult C.necessary  
D.sudden

**20.**

A.argument B.passengers C.patterns  
D.problem

**Broad**

**21.**

A.full B.moving C.quiet D.wide

**22.**

A.night B.river C.shoulders D.smile

**Conscious**

**23.**

A.awake B.healthy C.knowing D.laughing

**24.**

A.face B.decision C.effort D.student

**Convenient**

**25.**

A.easy B.fresh C.near D.suitable

**26.**

A.experience B.sound C.time D.vegetable

**Dense**

**27.**

A.crowded B.hot C.noisy D.thick

**28.**

A.forest B.handle C.smoke D.weather

**Curious**

**29.**

A.helpful B.interested C.missing D.strange

**30.**

A.accident B.child C.computer D.steel

名字\_\_\_\_\_

**Distinct**

**31.**

A.clear B.famous C.separate D.true

**32.**

A.advantage B.meanings C.news D.parents

**Dull**

**33.**

A.cloudy B.loud C.nice D.secret

**34.**

A.color B.knife C.place D.rock

**Direct**

**35.**

A.honest B.main C.straight D.wide

**36.**

A.fence B.flight C.heat D.river

**Favorable**

**37.**

A.helpful B.legal C.possible D.positive

**38.**

A.habit B.response C.teacher D.weather

**Secure**

**39.**

A.confident B.enjoyable C.fixed D.safe

**40.**

A.game B.job C.meal D.visitor



## Test instructions

- This test has 3 sections: Form, Meaning, and Use sections
- There are a total of 79 questions
- You cannot go back and change your answers
- You must choose an answer that is most likely to be correct if you don't know it
- There are no penalties for wrong answers

## 1. Form Section

- In order to use word part knowledge, you need to be able to recognise word parts.
- In this section, you are asked to choose a word part, a group of letters that change the meaning or the part of speech of a word.
- Wrong answers are a string of letters that occur in English words but do not change the meaning or the part of speech of a word.
- Here is an example.

① -ing      (2) -nge      (3) -eld      (4) -kle

In this example, (1) *-ing* is correct because it changes the part of speech of a word such as *walk* (verb => noun). (2) *-nge* is wrong because it appears in words like *change* and *orange* but does not change the meaning or the part of speech of *cha* and *or*. There are no such words as *cha* and *or*!

The first part of this section is about prefixes (word parts that attach to the beginning of a word).

- |                 |             |             |             |
|-----------------|-------------|-------------|-------------|
| 1. (1) ka-      | (2) ze-     | (3) de-     | (4) ti-     |
| 2. (1) ba-      | (2) oa-     | (3) lu-     | (4) ab-     |
| 3. (1) po-      | (2) bu-     | (3) wa-     | (4) en-     |
| 4. (1) na-      | (2) gi-     | (3) em-     | (4) ya-     |
| 5. (1) fe-      | (2) qu-     | (3) ra-     | (4) bi-     |
| 6. (1) uni-     | (2) dwe-    | (3) haz-    | (4) bal-    |
| 7. (1) vacat-   | (2) super-  | (3) stipu-  | (4) schoo-  |
| 8. (1) pro-     | (2) civ-    | (3) roc-    | (4) cha-    |
| 9. (1) il-      | (2) ha-     | (3) fa-     | (4) ug-     |
| 10. (1) daught- | (2) circum- | (3) carica- | (4) maneou- |
| 11. (1) sa-     | (2) za-     | (3) ex-     | (4) ut-     |

The second part of this section is about suffixes (word parts that attach to the end of a word)

- |               |           |           |           |
|---------------|-----------|-----------|-----------|
| 12. (1) -ous  | (2) -ney  | (3) -ope  | (4) -ime  |
| 13. (1) -ism  | (2) -ike  | (3) -nda  | (4) -arf  |
| 14. (1) -ible | (2) -ight | (3) -oach | (4) -inue |
| 15. (1) -ent  | (2) -ead  | (3) -rol  | (4) -gue  |
| 16. (1) -rse  | (2) -ack  | (3) -ful  | (4) -uin  |
| 17. (1) -oud  | (2) -eep  | (3) -ant  | (4) -pse  |

|     |            |            |            |            |
|-----|------------|------------|------------|------------|
| 18. | (1) -kout  | (2) -atic  | (3) -bour  | (4) -olve  |
| 19. | (1) -alia  | (2) -wise  | (3) -nana  | (4) -amel  |
| 20. | (1) -f     | (2) -y     | (3) -h     | (4) -g     |
| 21. | (1) -lf    | (2) -ss    | (3) -en    | (4) -mp    |
| 22. | (1) -lt    | (2) -ut    | (3) -al    | (4) -mb    |
| 23. | (1) -mme   | (2) -oom   | (3) -oad   | (4) -ive   |
| 24. | (1) -rove  | (2) -ulse  | (3) -some  | (4) -ribe  |
| 25. | (1) -eche  | (2) -eech  | (3) -ungr  | (4) -ence  |
| 26. | (1) -ition | (2) -lause | (3) -chool | (4) -oards |
| 27. | (1) -ward  | (2) -vern  | (3) -zzle  | (4) -vere  |
| 28. | (1) -hy    | (2) -ne    | (3) -ty    | (4) -rb    |
| 29. | (1) -ol    | (2) -th    | (3) -wn    | (4) -ak    |
| 30. | (1) -uit   | (2) -und   | (3) -eak   | (4) -eer   |
| 31. | (1) -ate   | (2) -rph   | (3) -yme   | (4) -uff   |
| 32. | (1) -aedia | (2) -olors | (3) -ation | (4) -aight |
| 33. | (1) -ways  | (2) -ause  | (3) -oice  | (4) -ript  |
| 34. | (1) -oard  | (2) -ogue  | (3) -laim  | (4) -most  |
| 35. | (1) -ly    | (2) -ma    | (3) -ra    | (4) -na    |
| 36. | (1) -hood  | (2) -ough  | (3) -erve  | (4) -inct  |
| 37. | (1) -ique  | (2) -less  | (3) -eeve  | (4) -itle  |

## 2. Meaning Section

- This section is about word part meanings.
- For each item, a word part is presented with two example words. (The word part may also appear in other words.)
- You must choose the meaning of the word part from four choices.
- Here is an example.

-ed (walked; played)

- (1) past
- (2) not
- (3) many
- (4) person

The first part of this section is about prefixes (word parts that attach to the beginning of a word).

- |                                                                                                                                                                                                                                                                                                                                                                                                                                                                                                                      |                                                                                                                                                                                                                                                                                                                                                                                                                                                                                                                                                                                                                                                                                                                            |
|----------------------------------------------------------------------------------------------------------------------------------------------------------------------------------------------------------------------------------------------------------------------------------------------------------------------------------------------------------------------------------------------------------------------------------------------------------------------------------------------------------------------|----------------------------------------------------------------------------------------------------------------------------------------------------------------------------------------------------------------------------------------------------------------------------------------------------------------------------------------------------------------------------------------------------------------------------------------------------------------------------------------------------------------------------------------------------------------------------------------------------------------------------------------------------------------------------------------------------------------------------|
| <p>1. ex- (<u>ex</u>-wife; <u>ex</u>-member)</p> <ul style="list-style-type: none"><li>(1) earlier</li><li>(2) person</li><li>(3) bad</li><li>(4) can be</li></ul> <p>2. ab- (<u>ab</u>use; <u>ab</u>normal)</p> <ul style="list-style-type: none"><li>(1) person/thing</li><li>(2) times</li><li>(3) small</li><li>(4) away from</li></ul> <p>3. il- (<u>il</u>legal; <u>il</u>logical)</p> <ul style="list-style-type: none"><li>(1) between</li><li>(2) around</li><li>(3) person/thing</li><li>(4) not</li></ul> | <p>4. circum- (<u>circum</u>polar; <u>circum</u>navigate)</p> <ul style="list-style-type: none"><li>(1) person/relating to</li><li>(2) small</li><li>(3) around</li><li>(4) beyond</li></ul> <p>5. uni- (<u>uni</u>sex; <u>uni</u>cycle)</p> <ul style="list-style-type: none"><li>(1) one</li><li>(2) person/thing</li><li>(3) not</li><li>(4) under</li></ul> <p>6. bi- (<u>bi</u>plane; <u>bi</u>sexual)</p> <ul style="list-style-type: none"><li>(1) person/thing</li><li>(2) two</li><li>(3) away from</li><li>(4) in advance</li></ul> <p>7. de- (<u>de</u>compose; <u>de</u>code)</p> <ul style="list-style-type: none"><li>(1) opposite</li><li>(2) person/thing</li><li>(3) together</li><li>(4) small</li></ul> |
|----------------------------------------------------------------------------------------------------------------------------------------------------------------------------------------------------------------------------------------------------------------------------------------------------------------------------------------------------------------------------------------------------------------------------------------------------------------------------------------------------------------------|----------------------------------------------------------------------------------------------------------------------------------------------------------------------------------------------------------------------------------------------------------------------------------------------------------------------------------------------------------------------------------------------------------------------------------------------------------------------------------------------------------------------------------------------------------------------------------------------------------------------------------------------------------------------------------------------------------------------------|

8. pro- (pro-democracy; pro-life)

- (1) supporting
- (2) against
- (3) one
- (4) too much

9. super- (supernatural; superhuman)

- (1) person
- (2) half
- (3) can be
- (4) beyond

The second part of this section is about  
suffixes (word parts that attach to the end  
of a word)

10. -ism (socialism; nationalism)

- (1) into another state/place
- (2) theory of
- (3) one
- (4) small

11. -hood (childhood; motherhood)

- (1) one
- (2) halfway
- (3) bad
- (4) a state of

12. -th (fourth; sixth)

- (1) person
- (2) number
- (3) not
- (4) small

13. -ways (sideways; lengthways)

- (1) not
- (2) person/thing
- (3) wrongly
- (4) direction

14. -ful (handful; mouthful)

- (1) not
- (2) person
- (3) small
- (4) amount

15. -wise (clockwise; stepwise)

- (1) person
- (2) direction
- (3) new
- (4) one

16. -en (wooden; golden)

- (1) one
- (2) beyond
- (3) opposite
- (4) made of

17. -ible (accessible; convertible)

- (1) can be
- (2) person/relating to
- (3) after
- (4) times

18. -less (endless; useless)

- (1) before
- (2) without
- (3) the furthest
- (4) person

19. -ward (upward; backward)
- (1) direction
  - (2) person
  - (3) self
  - (4) without
20. -eer (mountaineer; engineer)
- (1) not
  - (2) after
  - (3) amount
  - (4) person
21. -most (topmost; uppermost)
- (1) the furthest
  - (2) half
  - (3) person
  - (4) opposite

### 3. Use Section

- Some affixes have the function of changing the part of speech of a word. For example, some word parts change a noun to a verb.
- For each item, a word part is presented with two example words. (The word part may also appear in other words.)
- You must choose the part of speech of the two example words from noun, verb, adjective, and adverb.
- Here are examples of the four parts of speech.

(1) Noun: house (My house is old.); water (They drink water.)

(2) Verb: know (I know her.); talk (They talk a lot.)

(3) Adjective: young (He is young.); new (This is a new book.)

(4) Adverb: too (She likes it too.); often (He often plays football.)

- Here is an example of this section.

-ed (walked; played)

(1) Noun

(2) Verb

(3) Adjective

(4) Adverb

The example words *walked* and *played* are verbs because these words are used in sentences such as *She walked home* and *He played soccer yesterday*.

1. en- (ensure; enable)

(1) Noun

(2) Verb

(3) Adjective

(4) Adverb

3. -y (difficulty; honesty)

(1) Noun

(2) Verb

(3) Adjective

(4) Adverb

2. em- (empower; embody)

(1) Noun

(2) Verb

(3) Adjective

(4) Adverb

4. -ent (different; excellent)

(1) Noun

(2) Verb

(3) Adjective

(4) Adverb

5. -atic (systematic; problematic)
  - (1) Noun
  - (2) Verb
  - (3) Adjective
  - (4) Adverb
6. -ation (consideration; presentation)
  - (1) Noun
  - (2) Verb
  - (3) Adjective
  - (4) Adverb
7. -ate (formulate; activate)
  - (1) Noun
  - (2) Verb
  - (3) Adjective
  - (4) Adverb
8. -en (wooden; golden)
  - (1) Noun
  - (2) Verb
  - (3) Adjective
  - (4) Adverb
9. -ition (addition; opposition)
  - (1) Noun
  - (2) Verb
  - (3) Adjective
  - (4) Adverb
10. -al (proposal; approval)
  - (1) Noun
  - (2) Verb
  - (3) Adjective
  - (4) Adverb
11. -ence (difference; existence)
  - (1) Noun
  - (2) Verb
  - (3) Adjective
  - (4) Adverb
12. -ly (lively; friendly)
  - (1) Noun
  - (2) Verb
  - (3) Adjective
  - (4) Adverb
13. -less (endless; useless)
  - (1) Noun
  - (2) Verb
  - (3) Adjective
  - (4) Adverb
14. -some (troublesome; fearsome)
  - (1) Noun
  - (2) Verb
  - (3) Adjective
  - (4) Adverb
15. -al (personal; traditional)
  - (1) Noun
  - (2) Verb
  - (3) Adjective
  - (4) Adverb
16. -ive (active; effective)
  - (1) Noun
  - (2) Verb
  - (3) Adjective
  - (4) Adverb



17. -ant (resultant; pleasant)

- (1) Noun
- (2) Verb
- (3) Adjective
- (4) Adverb

18. -ible (accessible; convertible)

- (1) Noun
- (2) Verb
- (3) Adjective
- (4) Adverb

19. -ous (dangerous; continuous)

- (1) Noun
- (2) Verb
- (3) Adjective
- (4) Adverb

20. -ate (passionate; fortunate)

- (1) Noun
- (2) Verb
- (3) Adjective
- (4) Adverb

21. -ty (safety; uncertainty)

- (1) Noun
- (2) Verb
- (3) Adjective
- (4) Adverb

姓名\_\_\_\_\_ 班级\_\_\_\_\_ 学号\_\_\_\_\_

请判断前后两个单词是否有关系

比如 teach teacher 这个两个词就是有关系的，但是 pen penny 就是没关系的 一个是钢笔，一个是一分钱

|                            |                                |
|----------------------------|--------------------------------|
| 1. birth birthday YES NO   | 2. maintain maintenance YES NO |
| 3. pea peace YES NO        | 4. butter butterfly YES NO     |
| 5. straw strawberry YES NO | 6. dust industry YES NO        |
| 7. hand handsome YES NO    | 8. bake bakery YES NO          |
| 9. corn corner YES NO      | 10. man many YES NO            |
| 11. after afternoon YES NO | 12. dance dancer YES NO        |
| 13. too tooth YES NO       | 14. tell intellect YES NO      |
| 15. fire fireplace YES NO  | 16. preside president YES NO   |
| 17. ill illegal YES NO     | 18. heal health YES NO         |
| 19. art artist YES NO      | 20. dirt dirty YES NO          |

姓名\_\_\_\_\_ 班级\_\_\_\_\_ 学号\_\_\_\_\_

选出一个与同组其他词共同部分意思不一样的单词，请打一个圈 **O**

比如: mushroom, bedroom, classroom 应该选 mushroom，因为后两者 room 都是房间的意思。

|                                    |                                  |
|------------------------------------|----------------------------------|
| 1. postcard postpone postman       | 2. playback playground playroom  |
| 3. changeable readable syllable    | 4. dislike display disagree      |
| 5. leadership friendship spaceship | 6. estimate classmate roommate   |
| 7. highlight starlight sunlight    | 8. takeout without checkout      |
| 9. redwood firewood Hollywood      | 10. airbag airline airport       |
| 11. overload overheat overall      | 12. footstep footnote footprint  |
| 13. shoulder farmer teacher        | 14. headache headline headphone  |
| 15. hallway doorway anyway         | 16. freeman freedom freezing     |
| 17. undo uncle unlock              | 18. horseback throwback feedback |
| 19. reuse retire recycle           | 20. policeman fireman snowman    |
